**TITLE:** EPIDURAL VS INTRAVENOUS FENTANYL INFUSIONS IN POSTTHORACOTOMY PATIENTS: RESPIRATORY EFFECTS.

**AUTHORS:** DG Stringer MD, AN Sandler MD, L Panos MD, N Badner MD, S Lawson RN, M Friedlander MD

**AFFILIATION:** Dept. of Anaesthesia, Toronto General Hospital, Toronto, Ont.

Respiratory depression in patients receiving epidural fentanyl is uncommon. This prospective double-blind randomized study compared lumbar epidural and intravenous fentanyl infusions with respect to postoperative respiratory function.

**Methods:** With institutional approval and informed consent 27 patients undergoing thoracotomy were studied. Respiratory pattern [Respiratory Inductance Plethysmography (RIP)] and arterial blood gases (ABG) were measured preoperatively during sleep. RIP measured apnea (AP=tidal volume less than 100 ml) and slow respiratory rate (SRR=respiratory rate less than 10/min). After insertion of a lumbar epidural catheter patients were given a non-opioid general anaesthetic. Patients were allocated to one of two groups: Group E=epidural fentanyl infusion/iv saline infusion, Group I=epidural saline infusion/iv fentanyl infusion. Intraoperatively, a bolus of 1.5 ug/kg of fentanyl was given (E or I) followed by an infusion of 1.0 ug/kg/hr. Infusion rates were adjusted to provide high quality analgesia. Postoperatively RIP monitoring was resumed and ABG's and somnolence (1=awake, 5=unconscious) were measured at regular intervals. Results were analyzed using Student's t-test plus repeated measures analysis of variance and covariance.

**Results:** There were no significant between group differences for both pre and postoperative AP/hour, SRR/hour, pH, pCO<sub>2</sub>, pO<sub>2</sub> or somnolence. However, within groups there was a significant increase in SRR episodes, decrease in pH and rise in PCO<sub>2</sub> postoperatively.

**Discussion:** There was no difference in respiratory parameters between E and I fentanyl infusions post-thoracotomy although both were associated with respiratory depression.

TABLE 1. GROUP MEANS ( $\pm$  sem)

|                  | EPIDURAL       |                 | INTRAVENOUS    |                 |
|------------------|----------------|-----------------|----------------|-----------------|
|                  | Preop          | Postop          | Preop          | Postop          |
| pH               | 7.43 $\pm$ .01 | 7.34 $\pm$ .01* | 7.41 $\pm$ .01 | 7.33 $\pm$ .01* |
| PCO <sub>2</sub> | 39 $\pm$ 1     | 46 $\pm$ 1*     | 40 $\pm$ 2     | 48 $\pm$ 1*     |
| pO <sub>2</sub>  | 81 $\pm$ 3     | 108 $\pm$ 3*    | 83 $\pm$ 3     | 116 $\pm$ 3*    |
| Somn.            | N/A            | 1.6 $\pm$ 0.1   | N/A            | 1.6 $\pm$ 0.1   |
| AP/h             | 1.5 $\pm$ 0.5  | 5.2 $\pm$ 2.0   | 2.0 $\pm$ 0.7  | 3.1 $\pm$ 1.0   |
| SRR/h            | .02 $\pm$ .01  | 1.5 $\pm$ 0.3*  | 0.3 $\pm$ 0.2  | 1.3 $\pm$ 0.3*  |

\* P < 0.05 postop vs. preop N/A = Not applicable  
Somn = somnolence; AP/h = apneas/hour;  
SRR/h = slow respiratory rates/hour

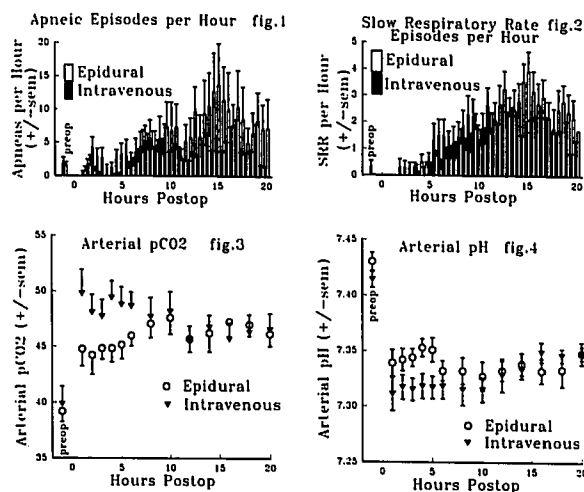

## A782

**TITLE:** DEEP AND SUPERFICIAL CERVICAL PLEXUS BLOCK WITH BUPIVACAINE FOR CAROTID ENDARTERECTOMY: PHARMACOKINETIC STUDY.

**AUTHORS:** B. Debaene, M.D., A. Elman, M.D., R. Squalli, M.D., P. Jolis, M.D., X. Mazoit, M.D.

**AFFILIATION:** Département d'Anesthésie, Hôpital Beaujon, 92110, Clichy, France.

Cervical plexus block is an effective technique for carotid endarterectomy (1). A previous pharmacokinetic study has shown that peak concentration of bupivacaine 0.5 % (18ml) with epinephrine is relatively low (1.67  $\mu$ g/ml), when associated with xylocaïne 2 % (10 ml) for superficial cervical plexus block (2). The aim of this study is to determine the pharmacokinetic parameters of bupivacaine following deep and superficial plexus block. Eight patients (ASA II-III) were studied after ethical approval and informed consent. The deep cervical plexus block was performed with 18 ml 0.5 % bupivacaine with epinephrine, the superficial block with 8 ml of the same solution (total dose : 130 mg). Continuous ECG and blood arterial pressure monitoring were recorded. Adequacy of cerebral perfusion was obtained by neurologic assessment of the awake patients. Evaluation of pain using a 0 to 10 visual analog scale was done preoperatively, at incision, cross clamping, unclamping and closure. Blood gas analysis was performed and arterial blood samples were assayed for bupivacaine from 0 to 600 minutes after bupivacaine administration. Plasma concentration was measured using gas chromatography. Non compartmental analysis was used to fit the data. Terminal half life (T 1/2  $\beta$ ), total body clearance (CL), ap-

parent volume of distribution (V<sub>B</sub>), maximum peak concentration (C MAX) and time to reach the peak (T MAX) were calculated. A satisfactory pain relief was obtained in all patients. No hemodynamic variations were observed. No respiratory depression was noted during the procedure. T 1/2  $\beta$  was 149  $\pm$  30 minutes; CL was 6.7  $\pm$  2.3 ml/min.kg; V<sub>B</sub> was 85.4  $\pm$  19.5 litres. C MAX reached 2.09  $\pm$  0.41  $\mu$ g/ml; T MAX was 12  $\pm$  7 min. Bupivacaine plasma concentration decrease is shown on figure 1.

For carotid endarterectomy, deep and superficial cervical plexus block with bupivacaine with epinephrine is a safe technique because C MAX never reached the plasma toxic level.

### References:

- 1-Arch. Surg. 122 : 807-812, 1987
- 2- Anesthesiology 69 : A373, 1988

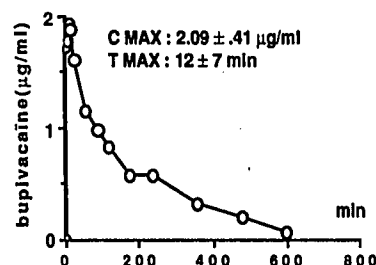

Figure 1 : Pharmacokinetics of bupivacaine
